# Supplementary material for: Differential contribution to gene expression prediction of histone modifications at enhancers or promoters
Source: PLoS Comput Biol. 2021 Sep 2;17(9):e1009368. doi: 10.1371/journal.pcbi.1009368 (PMC8443064; doi:10.1371/journal.pcbi.1009368)
Supplement: S2 Table — Coordinates of the identified bivalent promoters and their target genes (genome assembly mm10). (XLSX) [file pcbi.1009368.s014.xlsx]

## Sheet: Table S2
chr	start	end	gene
chr1	10231600	10233800	Arfgef1
chr1	104768200	104769800	Cdh20
chr1	105355200	105357400	Gm17634
chr1	105355200	105357400	Rnf152
chr1	105780000	105781600	Tnfrsf11a
chr1	106712400	106715000	Bcl2
chr1	112416000	112417000	Gm32810
chr1	120006400	120008200	Sctr
chr1	120340200	120343200	C1ql2
chr1	120601800	120606000	En1
chr1	121527200	121529000	Htr5b
chr1	124044800	124046400	Dpp10
chr1	125910800	125913400	Lypd1
chr1	126492200	126493000	Nckap5
chr1	126830000	126831000	Nckap5
chr1	127676600	127678400	Tmem163
chr1	128590000	128593600	Cxcr4
chr1	129273000	129274400	Thsd7b
chr1	131095600	131098400	Mapkapk2
chr1	131244400	131246400	Rassf5
chr1	131962200	131964400	Slc45a3
chr1	132067200	132068400	Mfsd4a
chr1	132298200	132299600	Klhdc8a
chr1	132316000	132317400	Nuak2
chr1	132390200	132392600	Tmcc2
chr1	132741000	132742400	Nfasc
chr1	132879200	132882200	Lrrn2
chr1	133044400	133048400	Pik3c2b
chr1	133907600	133909400	Optc
chr1	134234400	134236400	Adora1
chr1	134645400	134647800	Syt2
chr1	134708400	134710000	Syt2
chr1	135103800	135106000	Lgr6
chr1	135374000	135375400	Shisa4
chr1	135765200	135765800	Phlda3
chr1	135766200	135767400	Phlda3
chr1	135818000	135820600	Lad1
chr1	135918400	135919600	Pkp1
chr1	136050200	136051600	Ascl5
chr1	136259400	136261200	Gpr25
chr1	138841000	138842400	Lhx9
chr1	138846000	138847600	Lhx9
chr1	138848000	138850000	Lhx9
chr1	144003600	144005400	Rgs2
chr1	146495200	146495800	Brinp3
chr1	146497000	146499200	Brinp3
chr1	150099200	150100600	Ptgs2
chr1	150099200	150100600	Ptgs2os
chr1	152399600	152401000	Colgalt2
chr1	152624200	152626000	Rgl1
chr1	152954600	152956400	Nmnat2
chr1	153652800	153654000	Rgs8
chr1	153739600	153741400	Rgs16
chr1	154725600	154727200	Cacna1e
chr1	155097600	155100000	Ier5
chr1	155740400	155743600	Lhx4
chr1	156204200	156205400	Fam163a
chr1	156302400	156304000	Tdrd5
chr1	156310400	156311600	Nphs2
chr1	158355400	158356800	Brinp2
chr1	158362000	158363200	Astn1
chr1	15892200	15893600	Sbspon
chr1	160043800	160045000	4930523C07Rik
chr1	16092800	16093600	4930444P10Rik
chr1	162476200	162478400	Dnm3
chr1	163311600	163315600	Prrx1
chr1	165707200	165708600	Rcsd1
chr1	166238200	166238800	Mael
chr1	166253800	166254800	Ildr2
chr1	166409000	166410200	Pogk
chr1	166999800	167003800	Fam78b
chr1	166999800	167003800	Gm16701
chr1	167597600	167600200	Rxrg
chr1	167687800	167690200	Lmx1a
chr1	170587800	170590400	Nos1ap
chr1	170643800	170645000	Olfml2b
chr1	17096400	17098200	Jph1
chr1	172340200	172341600	Kcnj10
chr1	172549200	172551200	4933439K11Rik
chr1	173365800	173368400	Cadm3
chr1	174921000	174922000	Grem2
chr1	175491600	175493200	Rgs7
chr1	176274400	176276000	Pld5
chr1	176834800	176835800	Hmga2-ps1
chr1	178527200	178531200	Kif26b
chr1	179667600	179669600	Sccpdh
chr1	180329400	180333400	Gm5069
chr1	180329400	180333400	Itpkb
chr1	180482200	180484200	Stum
chr1	180696200	180697600	Mixl1
chr1	180941000	180944400	Tmem63a
chr1	181352000	181354400	Cnih3
chr1	182516400	182518800	Capn2
chr1	182747200	182749200	Ccdc185
chr1	182954800	182955800	Tlr5
chr1	184731400	184733800	Hlx
chr1	184810400	184811400	Marc1
chr1	184882000	184883600	C130074G19Rik
chr1	184998600	185000600	Mark1
chr1	185454200	185456200	Gm2061
chr1	185454200	185456200	Slc30a10
chr1	186703600	186706200	Tgfb2
chr1	187607200	187610200	Esrrg
chr1	187651200	187652600	Esrrg
chr1	187997800	187998400	Esrrg
chr1	189342600	189344400	Kcnk2
chr1	189920400	189925000	Smyd2
chr1	190167800	190171400	LOC102632463
chr1	190167800	190171400	Prox1
chr1	190978000	190979800	Vash2
chr1	19103800	19105600	Gm15825
chr1	191097200	191099000	Batf3
chr1	191182400	191187400	Atf3
chr1	191223600	191224200	D730003I15Rik
chr1	191224600	191225400	D730003I15Rik
chr1	191317200	191318000	Nenf
chr1	191325400	191327200	Tmem206
chr1	191717200	191720000	Lpgat1
chr1	19209000	19212400	Tfap2b
chr1	192190000	192191800	Kcnh1
chr1	192770000	192771800	Hhat
chr1	192833400	192836200	A730013G03Rik
chr1	192854000	192856800	Gm15867
chr1	192854000	192856800	Sertad4
chr1	193152600	193154200	Irf6
chr1	194619000	194621600	Plxna2
chr1	194938600	194939400	Cd34
chr1	21960400	21962600	Kcnq5
chr1	22805400	22806600	Rims1
chr1	23761200	23763800	B3gat2
chr1	24586400	24587600	Col19a1
chr1	32172000	32173600	Khdrbs2
chr1	33755800	33758400	Bag2
chr1	33906000	33909400	Bend6
chr1	33906000	33909400	Dst
chr1	34458800	34460600	Ptpn18
chr1	34498000	34499200	Prss39
chr1	34578600	34580200	Amer3
chr1	34635200	34636200	AA619741
chr1	36555000	36559200	Sema4c
chr1	3670400	3672800	Xkr4
chr1	37719200	37721000	2010300C02Rik
chr1	38626000	38629800	Aff3
chr1	39192400	39195400	Npas2
chr1	39649000	39651600	Creg2
chr1	39720400	39721600	Rfx8
chr1	40266200	40267600	Il1r1
chr1	40324000	40327000	Il1rl2
chr1	40679800	40682200	Slc9a2
chr1	42693800	42699200	Pantr1
chr1	42693800	42699200	Pou3f3
chr1	42713000	42714600	Pantr2
chr1	42952600	42954200	Gpr45
chr1	43163200	43164400	Fhl2
chr1	43730200	43731200	1500015O10Rik
chr1	4496200	4498000	Sox17
chr1	5017800	5021600	Rgs20
chr1	50926200	50928600	Tmeff2
chr1	52726000	52728000	Mfsd6
chr1	52816600	52818200	Inpp1
chr1	54193800	54195600	Hecw2
chr1	54925000	54927200	Ankrd44
chr1	55225400	55228200	Rftn2
chr1	55362400	55364000	Boll
chr1	55405200	55407200	Plcl1
chr1	56975400	56978600	Satb2
chr1	56980600	56981400	Satb2
chr1	57773600	57776400	Spats2l
chr1	58652600	58653200	Gm20257
chr1	58795200	58796200	Casp8
chr1	5916200	5918000	Npbwr1
chr1	60042200	60044000	Ica1l
chr1	61638400	61639800	Pard3b
chr1	62702400	62704400	Nrp2
chr1	63272600	63275400	Zdbf2
chr1	6358800	6359800	Alkal1
chr1	65311000	65312200	Pth2r
chr1	66467400	66469000	Unc80
chr1	66861800	66864200	Acadl
chr1	69105000	69108400	Erbb4
chr1	72534800	72537600	March4
chr1	72873000	72875400	Igfbp5
chr1	74124000	74125400	Rufy4
chr1	74124000	74125400	Tns1
chr1	74712600	74714200	Cyp27a1
chr1	74747600	74749000	Prkag3
chr1	74770800	74774200	Wnt6
chr1	74791000	74792400	Wnt10a
chr1	74884200	74886400	Fev
chr1	74892200	74894000	Cryba2
chr1	74900000	74901400	Mir375
chr1	74947600	74952200	Ihh
chr1	75140600	75143600	Cnppd1
chr1	75140600	75143600	Retreg2
chr1	75263400	75265200	Ptprn
chr1	75277400	75278600	Resp18
chr1	75360000	75361800	Des
chr1	75374400	75376000	Gm15179
chr1	75374400	75376000	Speg
chr1	75381400	75383200	Speg
chr1	75450000	75451200	Asic4
chr1	75503000	75507400	Inha
chr1	75503000	75507400	Obsl1
chr1	75545800	75547400	Slc4a3
chr1	78195800	78197800	Pax3
chr1	78309800	78312000	Sgpp2
chr1	78511000	78512200	Mogat1
chr1	79671200	79672200	Ap1s3
chr1	79856800	79859400	Serpine2
chr1	80756800	80759200	Dock10
chr1	82586200	82587600	Col4a3
chr1	82586200	82587600	Col4a4
chr1	84694800	84696800	Dner
chr1	84694800	84696800	Mir5126
chr1	84933800	84935800	Slc16a14
chr1	86045600	86047600	2810459M11Rik
chr1	86669400	86671200	Nppc
chr1	87153200	87156800	Ecel1
chr1	87183200	87183800	Prss56
chr1	87262800	87265800	Efhd1
chr1	87509000	87511000	Ngef
chr1	88204800	88206200	Dnajb3
chr1	89925800	89937000	Gbx2
chr1	90998200	90999800	Lrrfip1
chr1	91179400	91180600	Ramp1
chr1	91365600	91367600	Erfe
chr1	91800400	91802800	Twist2
chr1	92909800	92912200	5033417F24Rik
chr1	92909800	92912200	Rnpepl1
chr1	9298600	9300600	Sntg1
chr1	93100000	93102200	Kif1a
chr1	93235000	93237200	Sned1
chr1	93685000	93687200	Bok
chr1	95665200	95668800	St8sia4
chr1	97660000	97662800	D1Ertd622e
chr1	9797200	9798800	Sgk3
chr1	98094000	98096200	Pam
chr1	9908400	9909200	Mcmdc2
chr1	9966800	9968800	Tcf24
chr10	103026800	103031000	Alx1
chr10	10557400	10558000	Rab32
chr10	106470000	106470600	Ppfia2
chr10	107271400	107273400	Lin7a
chr10	11081600	11082200	Grm1
chr10	112269600	112272600	Kcnc2
chr10	114800200	114802800	Gm15723
chr10	114800200	114802800	Trhde
chr10	115586000	115588200	Lgr5
chr10	116113200	116114400	4933416C03Rik
chr10	116301000	116302000	Ptprb
chr10	116418000	116418600	Kcnmb4os1
chr10	116472200	116474800	Kcnmb4
chr10	116472200	116474800	Kcnmb4os2
chr10	116986400	116987800	Best3
chr10	117628800	117630400	Cpm
chr10	119452600	119455800	Grip1
chr10	119761800	119762400	Grip1os2
chr10	120474000	120478400	Hmga2
chr10	120898000	120899600	Msrb3
chr10	121309800	121311400	Tbc1d30
chr10	121350200	121352000	Tbc1d30
chr10	122448000	122449600	Avpr1a
chr10	122678000	122680800	Mir8104
chr10	122678000	122680800	Ppm1h
chr10	123264000	123266200	Fam19a2
chr10	126956400	126957800	Gm30539
chr10	127048000	127050400	Cyp27b1
chr10	127077600	127082000	Agap2
chr10	127164400	127168000	B4galnt1
chr10	127323200	127328200	Arhgap9
chr10	127533200	127535400	Nxph4
chr10	128932800	128934600	Itga7
chr10	13473200	13475200	Phactr2
chr10	13868200	13869800	Aig1
chr10	14544000	14545800	Adgrg6
chr10	14759400	14760800	Nmbr
chr10	18743200	18744200	Arfgef3
chr10	18743200	18744200	Gm32926
chr10	19355200	19357800	Olig3
chr10	19712400	19713400	Il20ra
chr10	19849000	19852200	Slc35d3
chr10	19933400	19936000	Map3k5
chr10	21881600	21883600	Sgk1
chr10	22273400	22274800	H60b
chr10	22819000	22820200	Tcf21
chr10	23348000	23351000	Eya4
chr10	23796200	23797200	Slc18b1
chr10	24223000	24224600	Moxd1
chr10	24710600	24712600	Enpp1
chr10	25359000	25361800	Epb41l2
chr10	26077800	26078800	Gm9767
chr10	26077800	26078800	Tmem200a
chr10	29533000	29537000	Rspo3
chr10	30842000	30845000	Hey2
chr10	31608200	31610200	Rnf217
chr10	3365800	3367800	Ppp1r14c
chr10	34127000	34128200	Calhm6
chr10	36506000	36509000	Hs3st5
chr10	38965600	38966600	Lama4
chr10	39926000	39927200	Mfsd4b2
chr10	40024400	40025800	Mfsd4b1
chr10	40682400	40684200	Mettl24
chr10	41070600	41072600	Gpr6
chr10	42582000	42585000	Nr2e1
chr10	43172600	43175800	9030612E09Rik
chr10	43172600	43175800	Sobp
chr10	45288800	45290400	Gm15934
chr10	45288800	45290400	Popdc3
chr10	45335000	45336800	Bves
chr10	49788000	49789200	Grik2
chr10	50894000	50895800	Sim1
chr10	51589600	51590600	Fam162b
chr10	51677000	51678600	Rfx6
chr10	52021800	52023400	Vgll2
chr10	52690600	52692000	Slc35f1
chr10	53378400	53380600	Cep85l
chr10	53750200	53752000	Fam184a
chr10	57631800	57633200	Pkib
chr10	57794400	57796000	Smpdl3a
chr10	58675000	58675600	Edar
chr10	58812000	58814800	Sh3rf3
chr10	5920800	5923000	Rgs17
chr10	60105200	60108000	Spock2
chr10	60217800	60219800	Chst3
chr10	61594600	61595800	Npffr1
chr10	61784000	61785200	H2afy2
chr10	61976800	61980400	Col13a1
chr10	62132000	62135200	Neurog3
chr10	62230200	62232200	Tspan15
chr10	62725400	62726800	Stox1
chr10	63099600	63101200	Atoh7
chr10	67535000	67539600	Egr2
chr10	67911400	67912600	Zfp365
chr10	68723400	68724800	Tmem26
chr10	69212000	69214200	A930033H14Rik
chr10	69212000	69214200	Rhobtb1
chr10	70244200	70246600	Slc16a9
chr10	71158400	71160400	Bicc1
chr10	75036600	75037800	Rab36
chr10	75316600	75318000	Adora2a
chr10	75559400	75560800	Lrrc75b
chr10	76569600	76571400	Gm15343
chr10	76623000	76623600	Col6a2
chr10	77969600	77970200	Trpm2
chr10	78591200	78592800	Syde1
chr10	78752000	78753400	Ccdc105
chr10	78779800	78781400	Slc1a6
chr10	79532600	79534800	Plpp2
chr10	79611000	79613800	C2cd4c
chr10	79715800	79718200	Hcn2
chr10	79776800	79778800	Fstl3
chr10	79793000	79794800	Palm
chr10	79873200	79875000	Plppr3
chr10	79970400	79971600	Grin3b
chr10	80302200	80302800	Apc2
chr10	80347600	80349200	Adamtsl5
chr10	80356000	80358400	Plk5
chr10	80494800	80497200	Onecut3
chr10	80843400	80844800	Lingo3
chr10	81194600	81195200	Atcayos
chr10	81252000	81253200	Matk
chr10	81256800	81258400	Matk
chr10	81342800	81343800	Gipc3
chr10	81426400	81427600	Nfic
chr10	81473200	81474800	Celf5
chr10	81481800	81482600	Celf5
chr10	81574600	81576600	Tle2
chr10	81595200	81597000	Tle6
chr10	82493000	82493600	Gm1553
chr10	82984200	82986800	Chst11
chr10	83337000	83338200	Slc41a2
chr10	84439600	84442800	Nuak1
chr10	84754600	84761200	Rfx4
chr10	85386200	85389400	Btbd11
chr10	85598200	85599400	Btbd11
chr10	85927400	85928000	Ascl4
chr10	86299800	86301400	Timp3
chr10	87492200	87495400	Ascl1
chr10	87859600	87862000	Igf1
chr10	88356400	88358000	Dram1
chr10	88885400	88886800	Slc5a8
chr10	90828600	90830200	Anks1b
chr10	93539600	93540800	Amdhd1
chr10	93539600	93540800	Ccdc38
chr10	93640400	93642600	Ntn4
chr10	93831400	93832400	Usp44
chr10	94311400	94312800	Tmcc3
chr10	94513800	94516600	Tmcc3
chr10	94942400	94946200	Plxnc1
chr10	9674200	9677000	Samd5
chr10	97692800	97694200	Ccer1
chr11	100144400	100146400	Krt19
chr11	100411800	100416200	Fkbp10
chr11	100411800	100416200	P3h4
chr11	100758800	100760200	Kcnh4
chr11	100761200	100763000	Hcrt
chr11	100849600	100851400	Stat5b
chr11	100968800	100971200	Cavin1
chr11	101069400	101071400	Naglu
chr11	101078400	101080400	Hsd17b1
chr11	101155200	101157000	Tubg2
chr11	101170000	101174600	Plekhh3
chr11	101176200	101177800	Cntnap1
chr11	101245400	101247000	Ramp2
chr11	102025000	102028000	Mpp3
chr11	102106800	102107800	Pyy
chr11	102145000	102148600	Nags
chr11	102445400	102449800	Fam171a2
chr11	102665000	102666400	Meioc
chr11	102761000	102762800	Adam11
chr11	102896600	102897600	Gfap
chr11	102944400	102949200	C1ql1
chr11	103080000	103081600	Plcd3
chr11	103100400	103102600	Acbd4
chr11	103100400	103102600	Plcd3
chr11	103170200	103173000	Fmnl1
chr11	103217400	103219000	Spata32
chr11	103648000	103650600	Rprml
chr11	103748800	103750400	Wnt9b
chr11	103770200	103775000	Wnt3
chr11	104131600	104134200	Crhr1
chr11	104607200	104609200	Itgb3
chr11	105291600	105294400	Mrc2
chr11	105456400	105457000	March10
chr11	105967200	105969000	Ace
chr11	106276000	106277000	Tcam1
chr11	107793000	107795400	Cacng4
chr11	107914400	107915800	Cacng5
chr11	109439600	109440800	Gm45916
chr11	109721000	109723200	Fam20a
chr11	11113400	11116800	Vwc2
chr11	112781000	112785400	Sox9
chr11	113618000	113620200	Sstr2
chr11	114064800	114068800	Sdk2
chr11	114727000	114728600	Dnaic2
chr11	114764600	114765800	Kif19a
chr11	114850000	114854200	Gprc5c
chr11	115091200	115092400	Rab37
chr11	115153400	115154600	Rab37
chr11	115265000	115267400	Grin2c
chr11	115296600	115298400	Fads6
chr11	115334400	115335200	Otop3
chr11	115366800	115368000	Hid1
chr11	115447200	115448400	Mir3968
chr11	115973800	115976800	Itgb4
chr11	116105600	116111000	Trim47
chr11	116130200	116131600	Trim65
chr11	116237400	116239000	Evpl
chr11	116280400	116283800	Galr2
chr11	116333000	116336400	Foxj1
chr11	116410800	116413800	Rnf157
chr11	116531000	116534400	Sphk1
chr11	116652600	116654800	Cygb
chr11	116826800	116828600	Mxra7
chr11	11684600	11687000	Ikzf1
chr11	117199000	117201000	Sept9
chr11	117859800	117860600	Tmem235
chr11	117861000	117861600	Tmem235
chr11	118354200	118356000	Timp2
chr11	118907400	118910200	Rbfox3
chr11	119080800	119087600	Cbx4
chr11	119227400	119229400	Ccdc40
chr11	119227400	119229400	Tbc1d16
chr11	119546400	119550600	Gm11762
chr11	119546400	119550600	Nptx1
chr11	120015200	120016600	Mir3065
chr11	120015200	120016600	Mir338
chr11	120046400	120048800	Aatk
chr11	12036200	12038400	Grb10
chr11	120530200	120531600	Gcgr
chr11	120721000	120722600	Rac3
chr11	121701800	121704400	Metrnl
chr11	121830000	121831400	Ptchd3
chr11	16257000	16258200	Vstm2a
chr11	16260600	16261200	Vstm2a
chr11	16751400	16753600	Egfr
chr11	17051800	17052800	Cnrip1
chr11	19018200	19021600	Meis1
chr11	21994600	22005000	Otx1
chr11	29824400	29825800	4931440F15Rik
chr11	31965000	31966200	4930524B15Rik
chr11	32347000	32349000	Sh3pxd2b
chr11	33198800	33204800	Tlx3
chr11	33843000	33843800	Kcnip1
chr11	35120200	35123000	Slit3
chr11	35797400	35799000	Fbll1
chr11	3774200	3775200	Osbp2
chr11	3863200	3864400	Osbp2
chr11	3983800	3985200	Gal3st1
chr11	4118000	4119200	Sec14l2
chr11	42181400	42183200	Gabra1
chr11	42418800	42421600	Gabrb2
chr11	4265600	4268600	Lif
chr11	43474000	43474800	C1qtnf2
chr11	43835000	43837200	Adra1b
chr11	44616400	44618800	Ebf1
chr11	45980400	45981600	Sox30
chr11	46165800	46167000	Nipal4
chr11	47378000	47379200	Sgcd
chr11	4745200	4747800	Cabp7
chr11	4946000	4948600	Ap1b1
chr11	4946000	4948600	Nefh
chr11	49608800	49610600	Flt4
chr11	49901400	49902600	Rasgef1c
chr11	50223800	50226600	Mgat4b
chr11	50230400	50232400	Mir6919
chr11	50601200	50604400	Adamts2
chr11	50849600	50851800	Grm6
chr11	51085000	51085600	9230009I02Rik
chr11	5151400	5153000	Emid1
chr11	52764000	52766000	Fstl4
chr11	53456600	53458000	Shroom1
chr11	53478200	53480600	Sowaha
chr11	53519000	53521800	Sept8
chr11	53858600	53859800	Gm12216
chr11	54027600	54029000	Slc22a4
chr11	54068200	54069600	Pdlim4
chr11	54100200	54101800	P4ha2
chr11	54304200	54305000	Acsl6
chr11	55077200	55078800	Ccdc69
chr11	55607000	55608800	Glra1
chr11	57831200	57834400	Hand1
chr11	5861000	5862600	Aebp1
chr11	58640200	58641400	Trim58
chr11	58961600	58962400	Gm12260
chr11	59134400	59136600	Obscn
chr11	59288600	59291400	Wnt3a
chr11	59305200	59309800	Wnt9a
chr11	59963400	59966200	Rasd1
chr11	60104600	60107400	Rai1
chr11	60138800	60141800	Rai1
chr11	6063800	6067000	Camk2b
chr11	61021400	61024000	Kcnj12
chr11	61342000	61343200	Slc47a2
chr11	61377000	61378400	Slc47a1
chr11	61484000	61485000	Mfap4
chr11	61683400	61685400	Fam83g
chr11	61957000	61958000	Specc1
chr11	62248000	62251800	Adora2b
chr11	63130000	63133400	Pmp22
chr11	63918200	63926600	Hs3st3b1
chr11	64434800	64437000	F930015N05Rik
chr11	64434800	64437000	Hs3st3a1
chr11	65269400	65271000	Myocd
chr11	6605200	6606200	Nacad
chr11	66525000	66528000	Shisa6
chr11	69156600	69157400	Alox12b
chr11	69196600	69198000	Alox8
chr11	69235000	69237200	Gucy2e
chr11	69340200	69341600	Rnf227
chr11	69364800	69369400	Chd3
chr11	69795400	69796400	Chrnb1
chr11	69833400	69835200	Nlgn2
chr11	69879200	69882200	Kctd11
chr11	69879200	69882200	Mir6924
chr11	69934200	69937400	Ybx2
chr11	69964600	69967200	Cldn7
chr11	70213400	70216000	Slc16a11
chr11	70253800	70255800	Alox12
chr11	70321200	70323200	Alox12e
chr11	70351200	70352800	Alox15
chr11	70458600	70460200	Cxcl16
chr11	70458600	70460200	Zmynd15
chr11	70519000	70521000	Gltpd2
chr11	70538800	70541200	Pld2
chr11	70615600	70616600	4930544D05Rik
chr11	7062800	7065400	Adcy1
chr11	71031800	71033400	6330403K07Rik
chr11	71750200	71752000	Wscd1
chr11	72041400	72043400	Pimreg
chr11	7212800	7215200	Igfbp3
chr11	72135000	72136800	Pitpnm3
chr11	72264800	72267800	1700051A21Rik
chr11	72264800	72267800	Slc13a5
chr11	72313400	72315200	Fbxo39
chr11	72960200	72962200	Atp2a3
chr11	73018200	73020600	4732414G09Rik
chr11	73018200	73020600	Camkk1
chr11	73159800	73161600	P2rx5
chr11	73329200	73329800	Spata22
chr11	74521400	74525200	Rap1gap2
chr11	74589000	74590800	Rap1gap2
chr11	75164200	75171200	Hic1
chr11	75171800	75174400	Mir132
chr11	75171800	75174400	Mir212
chr11	75193000	75195800	Rtn4rl1
chr11	75794800	75796600	Doc2b
chr11	75794800	75796600	Gm12339
chr11	76000000	76000600	1700016K19Rik
chr11	76026800	76028400	Rflnb
chr11	76201400	76203200	Fam57a
chr11	76570000	76572600	Abr
chr11	76672400	76673400	Bhlha9
chr11	76845600	76847600	Cpd
chr11	76997000	76999200	Slc6a4
chr11	77347600	77349400	Ssh2
chr11	77488800	77492200	Ankrd13b
chr11	77930400	77932400	Sez6
chr11	78924000	78926400	Nos2
chr11	79590000	79592200	Rab11fip4
chr11	79710200	79712400	Mir193a
chr11	80154000	80155200	Adap2
chr11	80300400	80303200	Rhbdl3
chr11	80809800	80811800	Tmem98
chr11	81151400	81154200	Asic2
chr11	81968600	81969200	Asic2
chr11	82386800	82390200	Tmem132e
chr11	82950600	82952600	Slfn5
chr11	82991200	82992800	Slfn9
chr11	83408800	83410800	Rasl10b
chr11	83429200	83429800	Gas2l2
chr11	83462200	83463400	Mmp28
chr11	83849600	83854200	Hnf1b
chr11	84522600	84527600	Lhx1
chr11	84522600	84527600	Lhx1os
chr11	84957400	84958600	Car4
chr11	85829000	85834200	2610027K06Rik
chr11	85829000	85834200	Tbx2
chr11	85889800	85891400	Tbx4
chr11	87073000	87074800	Gdpd1
chr11	87577600	87579000	Sept4
chr11	87616800	87618200	Hsf5
chr11	88098200	88101000	2210416O15Rik
chr11	88098200	88101000	Cuedc1
chr11	88169000	88170200	Cuedc1
chr11	88191400	88195000	Mrps23
chr11	88294200	88295200	Ccdc182
chr11	90029600	90031600	Tmem100
chr11	93097600	93100400	Car10
chr11	94242400	94244000	Wfikkn2
chr11	94392400	94393600	Abcc3
chr11	94498000	94500800	Epn3
chr11	94520800	94522000	Mycbpap
chr11	94563600	94565600	Chad
chr11	95009000	95010800	Samd14
chr11	95119600	95122000	Dlx3
chr11	95144400	95146600	Dlx4
chr11	95144400	95146600	Dlx4os
chr11	95823600	95825600	Phospho1
chr11	95912800	95916800	B4galnt2
chr11	96192400	96195000	Hoxb13
chr11	96202400	96205000	Gm11538
chr11	96269600	96272800	Hoxb9
chr11	96282400	96283800	Hoxb8
chr11	96285800	96287600	Hoxb7
chr11	96299000	96301200	Hoxb6
chr11	96302000	96305200	Hoxb5
chr11	96317800	96320800	Hoxb4
chr11	96351800	96355200	Hoxb2
chr11	96351800	96355200	Hoxb3os
chr11	96365200	96367200	Hoxb1
chr11	96463600	96465000	Gm11529
chr11	96463600	96465000	Skap1
chr11	97017600	97020000	Sp6
chr11	97114400	97116000	Tbx21
chr11	97148600	97153000	Tbkbp1
chr11	97499600	97501600	4933428G20Rik
chr11	98326200	98329400	Neurod2
chr11	98348200	98349800	Ppp1r1b
chr11	98384200	98384800	Tcap
chr11	98386400	98389400	Pnmt
chr11	98411600	98414000	Erbb2
chr11	98545200	98546400	Ikzf3
chr11	98981400	98983600	Gjd3
chr11	99993400	99994000	Krtap17-1
chr12	100898400	100900800	Gpr68
chr12	100907600	100909400	Gpr68
chr12	101818400	101820000	Fbln5
chr12	102128000	102129800	Slc24a4
chr12	102282600	102284400	Rin3
chr12	102899000	102899800	Cox8c
chr12	102948400	102950400	Unc79
chr12	104470800	104479400	Gsc
chr12	105008400	105010600	Syne3
chr12	105335200	105338000	Tunar
chr12	105562600	105565800	Bdkrb2
chr12	108001800	108006800	Bcl11b
chr12	108305400	108307200	Hhipl1
chr12	108701600	108703000	Degs2
chr12	109067200	109068800	Begain
chr12	109452800	109454000	Dlk1
chr12	110277200	110282000	Dio3
chr12	110277200	110282000	Dio3os
chr12	110277200	110282000	Mir1247
chr12	111270600	111272200	Amn
chr12	111406600	111407600	Lbhd2
chr12	111416600	111418000	Exoc3l4
chr12	111441600	111443400	Tnfaip2
chr12	11148400	11151200	Kcns3
chr12	111485000	111486800	Gm266
chr12	112130000	112131400	Mir203
chr12	112510400	112511600	Tmem179
chr12	112587400	112590000	Inf2
chr12	112619200	112621200	Adssl1
chr12	112673200	112675400	Akt1
chr12	112678400	112680400	Zbtb42
chr12	113150600	113152400	Crip1
chr12	113185600	113189000	Tmem121
chr12	11435800	11438600	4930511A02Rik
chr12	11435800	11438600	Vsnl1
chr12	11455400	11457000	Rad51ap2
chr12	116077200	116078400	Vipr2
chr12	116485400	116486800	Ptprn2
chr12	117150600	117151600	Gm10421
chr12	118198000	118199200	Dnah11
chr12	118529400	118531400	D230030E09Rik
chr12	118846000	118851200	Sp8
chr12	119237200	119239600	Itgb8
chr12	119945200	119947200	Tmem196
chr12	14149400	14153000	Fam84a
chr12	16653200	16654000	Ntsr2
chr12	16799800	16801400	Greb1
chr12	16810600	16812000	E2f6
chr12	17011000	17011600	2410004P03Rik
chr12	17175400	17177400	Kcnf1
chr12	17324000	17325400	Atp6v1c2
chr12	24680200	24682400	Cys1
chr12	29534600	29535800	Myt1l
chr12	29937600	29939600	Pxdn
chr12	30372600	30373400	Sntg2
chr12	30883800	30885200	Alkal2
chr12	31073400	31076000	Fam110c
chr12	31558800	31560000	Slc26a4
chr12	33928600	33929400	Ferd3l
chr12	33955600	33959400	Twist1
chr12	37105600	37109800	Meox2
chr12	3805800	3809000	Dnmt3a
chr12	3954400	3955600	Pomc
chr12	40133200	40134800	Scin
chr12	4132800	4135400	Adcy3
chr12	44221400	44222400	Gm2027
chr12	44328200	44331000	Nrcam
chr12	49382000	49386000	Foxg1
chr12	50647800	50649800	Prkd1
chr12	51592800	51594600	Coch
chr12	53246400	53249400	Npas3
chr12	5373200	5376600	2810032G03Rik
chr12	5373200	5376600	Klhl29
chr12	55598400	55601000	Insm2
chr12	56532800	56537000	Nkx2-1
chr12	56611600	56615800	Nkx2-9
chr12	56694800	56698400	Pax9
chr12	57196000	57197800	Slc25a21
chr12	57544800	57547200	Foxa1
chr12	58211400	58214200	Sstr1
chr12	58267800	58269800	Clec14a
chr12	61521000	61525000	Gm20063
chr12	61521000	61525000	Lrfn5
chr12	67220400	67223000	Mdga2
chr12	69241400	69242800	Klhdc1
chr12	69296000	69297800	Klhdc2
chr12	69790000	69791400	4930512B01Rik
chr12	69790000	69791400	Cdkl1
chr12	69986400	69987800	Sav1
chr12	70110200	70114200	Nin
chr12	71308800	71312000	Dact1
chr12	72069600	72071800	Gpr135
chr12	72235800	72237400	Rtn1
chr12	72406600	72409200	Rtn1
chr12	72939000	72942200	Six6
chr12	73043400	73047600	Six1
chr12	73583600	73586400	Prkch
chr12	73997200	73998400	Syt16
chr12	74283600	74284800	1700086L19Rik
chr12	75176000	75178200	Kcnh5
chr12	75307800	75309200	Rhoj
chr12	75734400	75736200	Sgpp1
chr12	75817400	75819800	Syne2
chr12	76176600	76177800	Esr2
chr12	76530600	76537000	Mir5135
chr12	76530600	76537000	Plekhg3
chr12	76709200	76711600	Sptb
chr12	76820400	76823400	Rab15
chr12	78906600	78907400	Plek2
chr12	79006200	79008000	Tmem229b
chr12	79130200	79131800	Arg2
chr12	80131800	80132600	2310015A10Rik
chr12	80518000	80520400	Galnt16
chr12	80691800	80693600	Plekhd1
chr12	80691800	80693600	Plekhd1os
chr12	80757000	80760800	Ccdc177
chr12	81332000	81333600	Slc8a3
chr12	82616200	82618000	Rgs6
chr12	8301200	8303000	Gdf7
chr12	83484400	83489400	Dpf3
chr12	83763400	83765400	Papln
chr12	84008600	84010400	Acot1
chr12	84069200	84070200	Acot5
chr12	84100400	84101600	Acot6
chr12	84569600	84572400	Vsx2
chr12	84640800	84643600	Vrtn
chr12	84698200	84699400	Syndig1l
chr12	84875400	84877400	D030025P21Rik
chr12	84875400	84877400	Ltbp2
chr12	85150400	85151400	Rps6kl1
chr12	85175200	85177800	Pgf
chr12	85471400	85476600	Fos
chr12	85597800	85600800	Jdp2
chr12	85686200	85687400	Batf
chr12	86078200	86079800	Tgfb3
chr12	86421200	86423600	Esrrb
chr12	86678200	86679800	Vash1
chr12	87101800	87102800	Ngb
chr12	87298800	87301200	Ism2
chr12	8947400	8949000	Matn3
chr12	91400400	91401600	Tshr
chr12	9570200	9571600	1700022H16Rik
chr12	98573600	98575600	Kcnk10
chr12	98577800	98578400	Kcnk10
chr12	99964200	99967400	Kcnk13
chr13	100107400	100108600	Serf1
chr13	100551200	100553600	Ocln
chr13	100615800	100617000	Marveld2
chr13	103333200	103335800	Mast4
chr13	10359400	10361400	Chrm3
chr13	104863000	104864400	Shisal2b
chr13	105053400	105055800	Rgs7bp
chr13	105443600	105445400	Htr1a
chr13	112651800	112652400	Ddx4
chr13	112993200	112994800	Mcidas
chr13	113034400	113035800	Cdc20b
chr13	113034400	113035800	Mir449c
chr13	113663000	113664200	Hspb3
chr13	114455200	114461200	Fst
chr13	114931000	114932600	Itga2
chr13	115099800	115102400	Itga1
chr13	116308800	116310800	Isl1
chr13	117023800	117026400	Parp8
chr13	117602400	117603400	Hcn1
chr13	118712800	118716600	Fgf10
chr13	119755400	119756800	Nim1k
chr13	12340000	12340800	Actn2
chr13	12519200	12520800	Edaradd
chr13	13783600	13785800	Gng4
chr13	14521600	14523200	Hecw1
chr13	16011600	16013000	Inhba
chr13	21980800	21982400	Pom121l2
chr13	23312800	23314000	4930557F10Rik
chr13	23312800	23314000	4930586N03Rik
chr13	23464000	23466600	Btn1a1
chr13	23709600	23711000	Hfe
chr13	23933200	23934800	Hist1h2aa
chr13	23933200	23934800	Hist1h2ba
chr13	24637800	24639600	Ripor2
chr13	24936800	24938800	9330162012Rik
chr13	24936800	24938800	Aldh5a1
chr13	25054800	25056800	Dcdc2a
chr13	30136000	30137200	Mboat1
chr13	30336600	30337400	Agtr1a
chr13	30748800	30751000	Irf4
chr13	31557200	31560600	Foxq1
chr13	31624400	31627400	Foxf2
chr13	31805800	31808800	Foxc1
chr13	34343600	34346200	Slc22a23
chr13	34651400	34653800	Gm15908
chr13	34651400	34653800	Pxdc1
chr13	34963000	34965600	Eci3
chr13	35967800	35970200	Ppp1r3g
chr13	3633800	3634800	Asb13
chr13	37826400	37828600	Rreb1
chr13	38150600	38153400	Dsp
chr13	38344400	38347600	Bmp6
chr13	40727600	40735200	Gm26688
chr13	40727600	40735200	Tfap2a
chr13	42709000	42710800	Phactr1
chr13	42866600	42867600	Phactr1
chr13	43784400	43785800	Cd83
chr13	45962800	45966400	Atxn1
chr13	46417600	46419400	Rbm24
chr13	46501400	46503400	Cap2
chr13	47013800	47015400	Nhlrc1
chr13	47122000	47124400	Rnf144b
chr13	48624600	48626200	Ptpdc1
chr13	48662400	48664000	Barx1
chr13	48869400	48872600	Phf2
chr13	49146200	49148400	Wnk2
chr13	49214800	49217000	Card19
chr13	49247000	49248800	Susd3
chr13	51169800	51172000	Nxnl2
chr13	51407600	51409600	S1pr3
chr13	51791800	51793400	Sema4d
chr13	52529800	52530600	Diras2
chr13	52977600	52982400	Nfil3
chr13	53284400	53286800	Ror2
chr13	53471600	53473200	Msx2
chr13	54054800	54055600	Drd1
chr13	54191800	54193000	Hrh2
chr13	54370800	54372800	Cplx2
chr13	54503800	54505000	Simc1
chr13	54749200	54750600	Gprin1
chr13	54765400	54766800	Sncb
chr13	54948200	54950400	Unc5a
chr13	55152400	55153600	Fgfr4
chr13	55414600	55415600	Pfn3
chr13	55830000	55832400	Pitx1
chr13	56251200	56252800	Neurog1
chr13	56295400	56297000	Cxcl14
chr13	56437200	56439200	Slc25a48
chr13	57907400	57908400	Spock1
chr13	58273000	58276000	Gkap1
chr13	58806200	58809000	Ntrk2
chr13	62887200	62888800	Fbp1
chr13	63572000	63574400	Ptch1
chr13	64273600	64275800	Cdc14b
chr13	68997400	69000200	Adcy2
chr13	69738200	69741000	Ube2ql1
chr13	70841200	70842200	Adamts16
chr13	71961800	71964600	Irx1
chr13	72627200	72632600	Gm20554
chr13	72627200	72632600	Irx2
chr13	73260000	73261400	Irx4
chr13	73535600	73537200	Slc6a3
chr13	73846600	73848000	Nkd2
chr13	74008600	74011000	Tppp
chr13	74120800	74122000	Slc9a3
chr13	74291800	74293200	Ahrr
chr13	74639200	74640400	Erap1
chr13	76055200	76057000	Gpr150
chr13	76383600	76385600	Mctp1
chr13	78197400	78200000	A830082K12Rik
chr13	78197400	78200000	Nr2f1
chr13	8202400	8203600	Adarb2
chr13	83522800	83525200	Mef2c
chr13	83720800	83722200	C130071C03Rik
chr13	83726600	83727800	C130071C03Rik
chr13	83737200	83739000	Mir9-2
chr13	88820800	88823800	Edil3
chr13	91741000	91742600	4833422C13Rik
chr13	91741000	91742600	Acot12
chr13	92425600	92427400	Ankrd34b
chr13	92529600	92531800	Zfyve16
chr13	92794400	92795200	Thbs4
chr13	93673800	93674800	Bhmt2
chr13	93673800	93674800	Dmgdh
chr13	93771200	93772400	Arsb
chr13	94874800	94876000	Otp
chr13	95222000	95223600	Pde8b
chr13	95249600	95250600	Pde8b
chr13	95323200	95323800	Zbed3
chr13	95442800	95444600	Crhbp
chr13	96130200	96134200	Sv2c
chr13	96923800	96926400	Gcnt4
chr13	98205400	98207000	Arhgef28
chr13	98353600	98356400	Foxd1
chr13	98694400	98695400	Tmem171
chr13	99899800	99901400	Cartpt
chr14	101607400	101609600	Tbc1d4
chr14	103843000	103845400	Ednrb
chr14	104521600	104523000	Rnf219
chr14	105426400	105427400	5430440P10Rik
chr14	108913800	108914600	Slitrk1
chr14	111674400	111678000	Slitrk5
chr14	115091400	115093600	Gpc5
chr14	116925000	116929200	Gpc6
chr14	118234000	118238200	LOC105245869
chr14	118234000	118238200	Sox21
chr14	118854000	118855600	Cldn10
chr14	119098800	119100000	Gm16835
chr14	119098800	119100000	Uggt2
chr14	119137200	119139400	Hs6st3
chr14	121034600	121037000	Farp1
chr14	122449400	122452200	Gm5089
chr14	122462800	122466800	Zic5
chr14	12342600	12347400	Fezf2
chr14	124191400	124193200	Fgf14
chr14	15437200	15439600	B230110C06Rik
chr14	15437200	15439600	Lrrc3b
chr14	16574600	16576200	Rarb
chr14	17659400	17662000	Thrb
chr14	18330400	18331800	Ube2e1
chr14	20707400	20708200	Zswim8
chr14	20733600	20735200	Ndst2
chr14	20836000	20837400	Plau
chr14	21984600	21991600	Zfp503
chr14	22019200	22020200	Lrmda
chr14	24003000	24005400	4930519K11Rik
chr14	24003000	24005400	Kcnma1
chr14	25603200	25604200	Gm45915
chr14	28504200	28507600	Wnt5a
chr14	28509000	28512600	Wnt5a
chr14	29720600	29723600	Cacna2d3
chr14	30008200	30009600	Chdh
chr14	30008200	30009600	Il17rb
chr14	30352200	30354600	Cacna1d
chr14	30625000	30627200	Prkcd
chr14	30714800	30718000	Sfmbt1
chr14	31435000	31436800	Sh3bp5
chr14	32388000	32388600	1700024G13Rik
chr14	32462600	32466000	Chat
chr14	32462600	32466000	Slc18a3
chr14	32596800	32600600	Prrxl1
chr14	32856600	32857800	Vstm4
chr14	33922600	33924200	Gdf10
chr14	33978400	33979200	Zfp488
chr14	34219400	34220600	Syt15
chr14	34818600	34821400	Grid1
chr14	39472000	39474200	LOC432842
chr14	39472000	39474200	Nrg3
chr14	41013000	41014400	Fam213a
chr14	41072600	41073400	Dydc1
chr14	41072600	41073400	Dydc2
chr14	44858200	44859800	Ptgdr
chr14	44988200	44990400	Ptger2
chr14	46881600	46885400	Samd4
chr14	48664000	48667800	Otx2
chr14	48668200	48670000	Otx2os1
chr14	49525400	49526200	Slc35f4
chr14	51989000	51989800	Gm16617
chr14	52327200	52328800	Sall2
chr14	54475600	54477000	Rem2
chr14	54625200	54626200	Psmb11
chr14	55113400	55117600	Jph4
chr14	55490200	55491400	Carmil3
chr14	55618400	55619000	Rec8
chr14	55761000	55763200	Ltb4r2
chr14	55783200	55784200	Adcy4
chr14	56364200	56365800	Atp12a
chr14	57056800	57058400	Gja3
chr14	57103600	57105200	Gjb2
chr14	57132400	57133800	Gjb6
chr14	57733800	57734400	Lats2
chr14	57744800	57746800	Lats2
chr14	58070200	58072800	Fgf9
chr14	60378000	60379400	Amer2
chr14	62555000	62556600	Fam124a
chr14	63244000	63247800	Gata4
chr14	63435800	63436800	Fam167a
chr14	63939600	63944400	Sox7
chr14	65261200	65263200	Fzd3
chr14	65266000	65267400	Fbxo16
chr14	65953000	65954200	Scara3
chr14	66279800	66281400	Ptk2b
chr14	66635000	66637400	Adra1a
chr14	66909200	66910800	Pnma2
chr14	67231600	67238200	Ebf2
chr14	68123400	68125400	A230070E04Rik
chr14	68123400	68125400	Nefm
chr14	69190200	69191400	Nkx3-1
chr14	70074200	70081000	Egr3
chr14	70176200	70178200	Pdlim2
chr14	70191400	70192800	Sorbs3
chr14	70205400	70208800	Sorbs3
chr14	70288600	70290200	Ppp3cc
chr14	70428600	70429600	Piwil2
chr14	70457000	70458600	Phyhip
chr14	70519000	70521200	Bmp1
chr14	70530200	70531800	Lgi3
chr14	70553600	70555600	Hr
chr14	70888000	70892000	Gfra2
chr14	75016000	75017000	Rubcnl
chr14	77155800	77158000	Enox1
chr14	78307200	78308800	Tnfsf11
chr14	79661000	79661800	Cnmd
chr14	79767400	79772600	Gm9748
chr14	79767400	79772600	Pcdh8
chr14	8002000	8002800	Abhd6
chr14	8003200	8004200	Abhd6
chr14	8316600	8318000	Fam107a
chr14	88470600	88471600	Pcdh20
chr14	93890000	93892200	Pcdh9
chr14	96517600	96519000	Klhl1
chr15	100598400	100601000	Pou6f1
chr15	100669000	100670000	Bin2
chr15	100728800	100730000	Galnt6
chr15	100869800	100872400	Scn8a
chr15	101052600	101054400	Fignl2
chr15	101128200	101129800	Acvrl1
chr15	101223400	101226000	A330009N23Rik
chr15	101223400	101226000	Grasp
chr15	101412000	101413200	Krt7
chr15	101438600	101439200	Krt87
chr15	101742400	101743200	Krt71
chr15	101817400	101818400	Krt2
chr15	102002000	102004200	Krt8
chr15	102027600	102029000	Krt18
chr15	102143200	102145200	Igfbp6
chr15	102366400	102367000	Sp7
chr15	102746200	102748200	Gm38436
chr15	102932200	102940400	Hoxc12
chr15	102947200	102947800	Hotair
chr15	102954200	102957600	Hoxc11
chr15	102966600	102967800	Hoxc10
chr15	102975400	102977600	Hoxc9
chr15	102981000	102982600	Gm36878
chr15	102990400	102991400	Hoxc8
chr15	103009200	103012400	Hoxc6
chr15	103013800	103016200	Hoxc5
chr15	103013800	103016200	Mir615
chr15	103034000	103036200	Hoxc4
chr15	103146400	103148400	D930007P13Rik
chr15	103254600	103255800	Nfe2
chr15	103502200	103504200	Pde1b
chr15	10952400	10953000	C1qtnf3
chr15	11035600	11038400	Rxfp3
chr15	11903200	11907600	Gm5144
chr15	11903200	11907600	Npr3
chr15	13172200	13175000	Cdh6
chr15	21111000	21111800	Cdh12
chr15	23036200	23037000	Cdh18
chr15	26894200	26896400	Fbxl7
chr15	27680600	27682200	Otulinl
chr15	31365200	31368600	Ankrd33b
chr15	34453000	34454200	Erich5
chr15	34678000	34679200	Nipal2
chr15	34836800	34839000	Kcns2
chr15	35295600	35297600	Osr2
chr15	39005600	39007600	Fzd6
chr15	39076400	39077800	Cthrc1
chr15	40654200	40656600	Zfpm2
chr15	42675800	42677200	Angpt1
chr15	43169600	43171200	Rspo2
chr15	4375000	4376800	Plcxd3
chr15	43869400	43870400	Tmem74
chr15	44747600	44749000	Sybu
chr15	44787200	44788200	2310069G16Rik
chr15	44787200	44788200	Sybu
chr15	45113600	45115200	Kcnv1
chr15	48789400	48792200	Csmd3
chr15	52038800	52041400	Aard
chr15	5241600	5245000	Ptger4
chr15	54571000	54572400	Mal2
chr15	54745400	54746400	Nov
chr15	54951600	54953000	Gm26684
chr15	55306400	55309400	Col14a1
chr15	55905000	55907600	Sntb1
chr15	57692800	57696600	Zhx2
chr15	58212400	58216200	Fbxo32
chr15	6385800	6387600	Dab2
chr15	64920200	64923600	Adcy8
chr15	66967200	66971200	Ndrg1
chr15	6873600	6875200	Osmr
chr15	68927600	68930200	Khdrbs3
chr15	71727800	71728400	Fam135b
chr15	72546000	72549600	Kcnk9
chr15	73838400	73840400	Mroh5
chr15	7397200	7399400	Egflam
chr15	75565000	75567600	Ly6h
chr15	75703400	75706200	Rhpn1
chr15	75745600	75748200	Mafa
chr15	75861800	75863000	Gsdmd
chr15	76089600	76092200	Nrbp2
chr15	76205400	76206800	Plec
chr15	76228600	76234000	Plec
chr15	76515800	76524400	Scrt1
chr15	7809400	7812400	Gdnf
chr15	78119200	78120400	Cacng2
chr15	7813000	7814200	Gdnf
chr15	7815000	7816000	Gdnf
chr15	78204000	78204800	Pvalb
chr15	78717800	78720200	Elfn2
chr15	78772600	78773400	Mfng
chr15	78801600	78803600	Card10
chr15	78842200	78846400	Cdc42ep1
chr15	78914000	78915600	Pdxp
chr15	78947400	78948600	Triobp
chr15	79041000	79043800	Galr3
chr15	79108000	79110600	Micall1
chr15	79163000	79164400	Sox10
chr15	79504600	79507800	Kcnj4
chr15	79515800	79518200	Kdelr3
chr15	79803600	79805200	Nptxr
chr15	80286800	80288600	Cacna1i
chr15	80571200	80573400	Grap2
chr15	80671200	80672400	Fam83f
chr15	81235200	81236000	Mchr1
chr15	81937000	81937800	Csdc2
chr15	82069800	82070600	Mei1
chr15	82211400	82213200	Shisa8
chr15	82223800	82225000	Tnfrsf13c
chr15	82274400	82276600	Sept3
chr15	82298600	82299800	Wbp2nl
chr15	82340400	82342200	Pheta2
chr15	82379400	82380200	Cyp2d22
chr15	82380600	82381200	Cyp2d22
chr15	82910400	82912200	Tcf20
chr15	82958200	82958800	Mir3080
chr15	83033000	83033600	Nfam1
chr15	83525800	83527800	Bik
chr15	83724000	83726200	Scube1
chr15	83779200	83780800	Mpped1
chr15	84104800	84106800	Sult4a1
chr15	84445200	84446800	Shisal1
chr15	84662600	84664600	Prr5
chr15	85016600	85017800	Upk3a
chr15	85131400	85132600	Ribc2
chr15	85131400	85132600	Smc1b
chr15	85576000	85578400	Wnt7b
chr15	85580000	85583200	AU022754
chr15	85580000	85583200	Wnt7b
chr15	85734400	85736600	Ppara
chr15	85821000	85822400	Pkdrej
chr15	86057200	86059600	Gramd4
chr15	86184400	86186600	Cerk
chr15	86184400	86186600	Gm15569
chr15	87544000	87545400	Fam19a5
chr15	88954000	88955400	Ttll8
chr15	88982600	88983400	Mov10l1
chr15	89058800	89061000	Panx2
chr15	89139600	89140800	Mapk12
chr15	89378200	89380000	Odf3b
chr15	89453600	89455600	Mapk8ip2
chr15	89841000	89842400	Syt10
chr15	91048600	91050600	Kif21a
chr15	92050600	92052200	Cntn1
chr15	92396600	92397800	Pdzrn4
chr15	93335600	93338200	Yaf2
chr15	93518000	93521200	Prickle1
chr15	93594400	93596800	Prickle1
chr15	94403000	94405000	Adamts20
chr15	94629000	94629800	Tmem117
chr15	95526600	95529000	Nell2
chr15	95654000	95655200	Dbx2
chr15	97246400	97248400	Amigo2
chr15	97246400	97248400	Pced1b
chr15	97766400	97768800	Rapgef3
chr15	97828600	97832400	Hdac7
chr15	97907400	97909200	Vdr
chr15	98001200	98005600	Col2a1
chr15	98167400	98168800	Ccdc184
chr15	98295600	98296800	Zfp641
chr15	98497400	98498600	Olfr279
chr15	98775800	98779000	Wnt10b
chr15	98789600	98793400	Wnt1
chr15	98803000	98808800	Ddn
chr15	98897400	98898600	Dhh
chr15	99052800	99057800	Prph
chr15	99087200	99089200	C1ql4
chr15	99221400	99227400	Kcnh3
chr15	99527400	99528200	Faim2
chr15	99579000	99580000	Aqp2
chr15	99590000	99591600	Aqp5
chr15	99670000	99672000	Asic1
chr16	10312800	10314400	Emp2
chr16	10394600	10395600	Tekt5
chr16	10489200	10491000	Ciita
chr16	11065400	11067600	Snn
chr16	11983000	11985400	Gm32278
chr16	11983000	11985400	Shisa9
chr16	13446600	13450200	Mir193b
chr16	14291400	14293200	Myh11
chr16	15886200	15889400	Cebpd
chr16	17575000	17577200	Slc7a4
chr16	17796800	17799000	Scarf2
chr16	17833000	17834600	B830017H08Rik
chr16	17914000	17915600	Gsc2
chr16	18126800	18128400	Rtn4r
chr16	18586000	18592200	Tbx1
chr16	18620200	18622400	Gp1bb
chr16	18629200	18630600	Sept5
chr16	18775200	18778400	Cldn5
chr16	20240200	20242200	Map6d1
chr16	20589000	20591600	Vwa5b2
chr16	20619200	20623600	Camk2n2
chr16	20629000	20630800	Ece2
chr16	20732400	20735000	Chrd
chr16	20732400	20735000	Thpo
chr16	21693200	21695800	2510009E07Rik
chr16	22655800	22657600	Dgkg
chr16	26104800	26106400	P3h2
chr16	26371200	26372000	Cldn1
chr16	26581000	26582600	Il1rap
chr16	26967800	26968600	Gmnc
chr16	28444800	28447600	Fgf12
chr16	28564000	28565600	Fgf12
chr16	28752600	28753200	Fgf12
chr16	29209000	29210800	Hrasls
chr16	30282600	30285600	Lrrc15
chr16	30308200	30310600	Gp5
chr16	31931600	31935800	Pigz
chr16	33684000	33685600	Heg1
chr16	33828600	33829400	Itgb5
chr16	35154000	35157000	Adcy5
chr16	35540200	35543400	Sema5b
chr16	35870600	35873200	Parp14
chr16	36561000	36562200	Casr
chr16	36694000	36695200	Ildr1
chr16	37916000	37917200	Gpr156
chr16	38712200	38713600	Arhgap31
chr16	38902200	38903000	Igsf11
chr16	39984400	39985200	Lsamp
chr16	41533000	41533800	Lsamp
chr16	43979000	43980600	Zdhhc23
chr16	44331800	44333400	Sidt1
chr16	45408200	45409000	Cd200
chr16	45843000	45845200	Phldb2
chr16	5131000	5133200	Ppl
chr16	5884600	5886000	Rbfox1
chr16	60604600	60607000	Epha6
chr16	63863200	63864600	Epha3
chr16	65105000	65106200	Htr1f
chr16	7038400	7040000	Rbfox1
chr16	74411000	74412400	Robo2
chr16	78930800	78931600	Chodl
chr16	8424200	8425400	Tmem114
chr16	8512800	8514200	Abat
chr16	85171800	85174400	App
chr16	85898800	85902000	Adamts5
chr16	88288800	88290800	Grik1
chr16	90829600	90832000	Eva1c
chr16	91224600	91227800	Olig2
chr16	91269000	91272000	Olig1
chr16	91405800	91407200	Il10rb
chr16	91546200	91548800	Ifngr2
chr16	92497800	92499600	Clic6
chr16	92696600	92700400	Runx1
chr16	94083600	94086400	Sim2
chr16	94327600	94329600	Ripply3
chr16	94997000	94998000	Kcnj6
chr16	95584800	95586400	Erg
chr16	96280200	96281400	B3galt5
chr16	97169600	97171400	Dscam
chr16	97356200	97358000	Bace2
chr16	97610200	97611600	Tmprss2
chr16	97761000	97764600	Ripk4
chr16	9992000	9996000	Grin2a
chr17	12506600	12508000	Slc22a3
chr17	12741200	12742800	Airn
chr17	12768200	12770200	Igf2r
chr17	14204000	14204800	Dact2
chr17	14279000	14281000	Smoc2
chr17	14694200	14694800	Thbs2
chr17	15374200	15383000	Dll1
chr17	23643600	23645400	Mmp25
chr17	23660400	23662000	Bicdl2
chr17	23678800	23680800	Cldn6
chr17	23738800	23741000	Paqr4
chr17	23744600	23746800	Kremen2
chr17	24350600	24353200	Abca3
chr17	24488000	24489600	Caskin1
chr17	24649400	24651000	Slc9a3r2
chr17	24657000	24658800	Npw
chr17	24688800	24690400	Syngr3
chr17	24752200	24754600	Hs3st6
chr17	25245400	25246200	Mir3547
chr17	25255000	25256800	Baiap3
chr17	25432000	25435000	Cacna1h
chr17	25471400	25472200	Tekt4
chr17	25496400	25497200	Sstr5
chr17	25569800	25571800	2810468N07Rik
chr17	25569800	25571800	Sox8
chr17	25808200	25810200	Fbxl16
chr17	25951200	25952800	A930017K11Rik
chr17	25951200	25952800	D630044L22Rik
chr17	26200400	26201800	Arhgdig
chr17	26202200	26205400	Rgs11
chr17	26414400	26415600	Neurl1b
chr17	26841000	26842000	Nkx2-5
chr17	26945600	26948000	Mir3083
chr17	26948400	26950000	Mir3083
chr17	27655000	27656800	Pacsin1
chr17	27685000	27686400	Pacsin1
chr17	28768800	28770800	Mapk13
chr17	29236800	29239000	Cpne5
chr17	29886400	29890400	Mdga1
chr17	30900600	30902800	Glp1r
chr17	31635600	31638200	Cbs
chr17	31677200	31678600	Cryaa
chr17	3326000	3327800	Tiam2
chr17	33977200	33979400	H2-K2
chr17	33999000	34000800	H2-K1
chr17	34039000	34039800	Col11a2
chr17	34186800	34188600	Psmb9
chr17	34186800	34188600	Tap1
chr17	34196600	34198800	Psmb8
chr17	34203800	34206000	Tap2
chr17	34263200	34265800	H2-Ab1
chr17	34671000	34672800	Tnxb
chr17	34881400	34882000	C2
chr17	35045600	35046200	Msh5
chr17	35195200	35196600	Mir6973a
chr17	35205000	35205600	Lta
chr17	35205000	35205600	Mir6974
chr17	35262400	35264600	H2-D1
chr17	35262400	35264600	H2-L
chr17	35320400	35321400	H2-Q1
chr17	35342200	35343400	H2-Q2
chr17	35379000	35380400	H2-Q4
chr17	35425000	35426000	H2-Q6
chr17	35425000	35426000	H2-Q8
chr17	35438800	35439600	H2-Q7
chr17	35438800	35439600	H2-Q9
chr17	35469600	35471000	H2-Q10
chr17	35699200	35702800	Ddr1
chr17	36082200	36084400	H2-Bl
chr17	36110600	36111800	H2-T-ps
chr17	36145400	36146000	2410017I17Rik
chr17	36189200	36190400	H2-T3
chr17	36866600	36868000	Trim15
chr17	36942400	36944200	Rnf39
chr17	37196000	37198600	Olfr94
chr17	37211000	37212000	Olfr95
chr17	37270600	37271400	H2-M3
chr17	39843000	39846800	Rn45s
chr17	40879400	40881200	9130008F23Rik
chr17	42315600	42317400	Ptchd4
chr17	43016800	43018400	Tnfrsf21
chr17	43629200	43630800	Tdrd6
chr17	43801200	43802600	Rcan2
chr17	44188000	44189400	Clic5
chr17	44733800	44739000	Runx2
chr17	45555800	45556600	Nfkbie
chr17	46029000	46033000	Vegfa
chr17	46253600	46255000	Lrrc73
chr17	46296800	46299200	Dlk2
chr17	46487000	46487800	Ttbk1
chr17	46728600	46729600	Gnmt
chr17	47831600	47834800	Mdfi
chr17	49563400	49564800	Daam2
chr17	50189400	50191200	Rftn1
chr17	50508400	50510600	Plcl2
chr17	51811200	51814400	Satb1
chr17	51831200	51834400	Satb1
chr17	54298200	54299000	Slc5a7
chr17	55445000	55447000	St6gal2
chr17	55969800	55971800	Shd
chr17	55986600	55987400	Fsd1
chr17	56139400	56140800	Sema6b
chr17	56469600	56478400	Ptprs
chr17	56733400	56734000	Fut4-ps1
chr17	56756800	56757600	Nrtn
chr17	57086800	57087800	Tubb4a
chr17	57103400	57106600	Gm11110
chr17	57103400	57106600	Tnfsf9
chr17	57148800	57150000	Cd70
chr17	57278800	57279800	Vav1
chr17	5940200	5942200	Synj2
chr17	65770800	65772800	Rab31
chr17	67353000	67355600	Ptprm
chr17	68273400	68274400	L3mbtl4
chr17	68836600	68838000	Tmem200c
chr17	69075000	69077600	Epb41l3
chr17	69156000	69158200	Epb41l3
chr17	69438000	69440600	Akain1
chr17	69968600	69970800	Dlgap1
chr17	71182000	71185200	Lpin2
chr17	71310000	71312200	Emilin2
chr17	72603000	72605200	Alk
chr17	72917400	72920000	Lbh
chr17	73107200	73109000	Lclat1
chr17	73709200	73711200	Galnt14
chr17	73805000	73805800	Ehd3
chr17	74047000	74048800	Srd5a2
chr17	79051600	79053200	Qpct
chr17	79353400	79357000	Cdc42ep3
chr17	79712200	79716600	Cyp1b1
chr17	80372800	80374200	Gm10190
chr17	80943800	80945400	Tmem178
chr17	8243400	8244600	Ccr6
chr17	83213400	83216400	Pkdcc
chr17	8340400	8342200	Prr18
chr17	8388800	8390000	Gm16702
chr17	8432200	8435400	T
chr17	8524000	8526400	Pde10a
chr17	85616400	85619200	Six3os1
chr17	85621000	85622200	Six3
chr17	85685000	85690000	Six2
chr17	87796600	87799600	Kcnk12
chr17	8800000	8803600	Pde10a
chr17	90454200	90456600	Nrxn1
chr17	9669000	9669600	Pabpc6
chr18	10324800	10326000	Greb1l
chr18	11048000	11055400	1010001N08Rik
chr18	11048000	11055400	Gata6
chr18	11838400	11841400	Cables1
chr18	11838400	11841400	Gm6277
chr18	11838400	11841400	Mir1901
chr18	12305000	12306000	Ankrd29
chr18	12333200	12335200	Lama3
chr18	12643200	12645200	Ttc39c
chr18	15061200	15066800	Kctd1
chr18	15149600	15152000	Kctd1
chr18	15759200	15760600	Chst9
chr18	16806600	16810200	Cdh2
chr18	20001600	20002400	Dsc3
chr18	20058400	20059600	Dsc2
chr18	21651400	21654200	4930426D05Rik
chr18	21651400	21654200	Klhl14
chr18	22343000	22345400	Asxl3
chr18	23309800	23311200	Dtna
chr18	24708200	24711600	Fhod3
chr18	25678800	25680400	Celf4
chr18	25753000	25755600	Celf4
chr18	31930600	31933000	Lims2
chr18	32138800	32140200	Proc
chr18	32376400	32379200	A830052D11Rik
chr18	32376400	32379200	Bin1
chr18	32559200	32560200	Gypc
chr18	32938600	32940600	Camk4
chr18	34408400	34410000	Pkd2l2
chr18	34542600	34543400	Wnt8a
chr18	34719400	34720600	Gfra3
chr18	35651800	35655800	Prob1
chr18	35964600	35965600	Psd2
chr18	36725000	36727000	Cd14
chr18	36930000	36931200	Pcdha1
chr18	36939200	36940000	Pcdha2
chr18	36946000	36946600	Pcdha3
chr18	36952600	36955000	Gm37013
chr18	36952600	36955000	Pcdha4
chr18	36960200	36961000	Pcdha5
chr18	37005200	37006000	Pcdha10
chr18	37010600	37011400	Pcdha11
chr18	37020000	37022600	Pcdha12
chr18	37090000	37091000	Pcdhac1
chr18	37143000	37144800	Pcdhac2
chr18	37264400	37265800	Pcdhb1
chr18	37294800	37295400	Pcdhb2
chr18	37300800	37301600	Pcdhb3
chr18	37518400	37520400	Pcdhb22
chr18	37669000	37670000	Pcdhga2
chr18	37674400	37675400	Pcdhga3
chr18	37680200	37681000	Pcdhgb1
chr18	37685200	37686200	Pcdhga4
chr18	37689800	37691600	Pcdhgb2
chr18	37694200	37695600	Pcdhga5
chr18	37707000	37708000	Pcdhga6
chr18	37714200	37715800	Pcdhga7
chr18	37720800	37722400	Pcdhgb4
chr18	37725200	37727000	Pcdhga8
chr18	37736800	37738000	Pcdhga9
chr18	37747000	37748200	Pcdhga10
chr18	37751600	37754000	Pcdhgb7
chr18	37755600	37758600	Pcdhga11
chr18	37761400	37764400	Pcdhgb8
chr18	37766000	37769000	Pcdhga12
chr18	37813600	37817200	Pcdhgc4
chr18	37818800	37820000	Pcdhgc5
chr18	37998200	37999600	Arap3
chr18	38207600	38213000	Pcdh1
chr18	42053800	42054400	Sh3rf2
chr18	42393800	42396200	Pou4f3
chr18	42898400	42900000	Ppp2r2b
chr18	43437400	43438800	Dpysl3
chr18	4351800	4354400	4833419F23Rik
chr18	4351800	4354400	Map3k8
chr18	44661000	44663000	A930012L18Rik
chr18	44661000	44663000	Mcc
chr18	44811400	44813000	Mcc
chr18	46197600	46200000	Trim36
chr18	46211200	46214200	Trim36
chr18	46464600	46466200	Mospd4
chr18	46848600	46850800	Lvrn
chr18	47366200	47371000	Sema6a
chr18	51117000	51118800	Prr16
chr18	52528600	52530200	Lox
chr18	52767400	52769400	Sncaip
chr18	53461000	53465800	Prdm6
chr18	57132800	57133800	Megf10
chr18	58208800	58212000	Fbn2
chr18	58658600	58660200	Isoc1
chr18	59174400	59176800	Chsy3
chr18	60622200	60625400	Synpo
chr18	60910000	60912600	Arsi
chr18	61035200	61037600	Cdx1
chr18	61044800	61045800	Pdgfrb
chr18	61400400	61402000	Ppargc1b
chr18	61535200	61537200	Arhgef37
chr18	61785800	61787200	Afap1l1
chr18	61910000	61912000	Ablim3
chr18	62178600	62181200	Adrb2
chr18	62178600	62181200	Gm9949
chr18	62323600	62324600	Htr4
chr18	63385800	63387600	Piezo2
chr18	64338600	64341600	Onecut2
chr18	64659600	64662000	Atp8b1
chr18	65873200	65874400	Grp
chr18	65937600	65940000	Rax
chr18	66290400	66293000	Ccbe1
chr18	66457400	66460000	Pmaip1
chr18	66859400	66861200	Mc4r
chr18	67087800	67089600	Gnal
chr18	67132800	67134600	Gnal
chr18	67342600	67344800	B430212C06Rik
chr18	67342600	67344800	Cidea
chr18	67390000	67392400	Tubb6
chr18	67464000	67465800	Prelid3a
chr18	7000400	7006000	Mkx
chr18	70052600	70053800	Rab27b
chr18	72350400	72351200	Dcc
chr18	74441600	74445000	Myo5b
chr18	74960600	74963200	Lipg
chr18	75818800	75822000	Zbtb7c
chr18	76058400	76060800	Zbtb7c
chr18	76856000	76856800	Skor2
chr18	77185000	77186400	St8sia5
chr18	77793600	77795400	Pstpip2
chr18	80362600	80364400	Kcng2
chr18	80707400	80709200	Nfatc1
chr18	80712000	80715800	Nfatc1
chr18	80983800	80989000	Sall3
chr18	82405400	82407800	Galr1
chr18	82474600	82478000	Mbp
chr18	82553600	82555400	Mbp
chr18	82909200	82915600	Zfp516
chr18	82920600	82921200	4930592I03Rik
chr18	84084800	84091000	Tshz1
chr18	84084800	84091000	Zadh2
chr18	84719000	84721400	Fam69c
chr18	86394200	86396200	Neto1
chr18	86710400	86713800	Cbln2
chr18	89768600	89770200	Dok6
chr18	9210000	9215400	Fzd8
chr18	9707000	9709000	Colec12
chr19	10041000	10042400	Fads3
chr19	10304200	10305600	Dagla
chr19	10456200	10458400	Lrrc10b
chr19	10633800	10635600	Vwce
chr19	10843000	10843800	Slc15a3
chr19	12500800	12502200	Dtx4
chr19	12595400	12596800	A330040F15Rik
chr19	16870400	16877000	Foxb2
chr19	16955800	16957000	Prune2
chr19	17835400	17838400	Pcsk5
chr19	18749400	18750600	Trpm6
chr19	19110000	19112200	Rorb
chr19	21472000	21473000	Gda
chr19	23447000	23448400	Mamdc2
chr19	24029800	24033200	Fam189a2
chr19	24861200	24862400	Pgm5
chr19	24899000	24901200	Foxd4
chr19	24998800	25000400	Dock8
chr19	25505000	25507600	Dmrt1
chr19	25608400	25612000	Dmrt3
chr19	25671600	25674600	2610016A17Rik
chr19	25671600	25674600	Dmrt2
chr19	26603800	26608400	Smarca2
chr19	27216000	27219400	Vldlr
chr19	27322800	27324200	Kcnv2
chr19	28834000	28836600	Slc1a1
chr19	29250600	29253000	Jak2
chr19	30029200	30033000	Uhrf2
chr19	30548400	30550600	Dkk1
chr19	31663400	31665600	Prkg1
chr19	31762000	31765800	Prkg1
chr19	32595200	32596400	Papss2
chr19	3414000	3415000	Gal
chr19	34290000	34291400	Fas
chr19	34474200	34476400	Ch25h
chr19	34746400	34747800	Slc16a12
chr19	36056400	36058000	Htr7
chr19	36736000	36737200	Ppp1r3c
chr19	36918000	36920200	Fgfbp3
chr19	37173400	37176400	A330032B11Rik
chr19	37173400	37176400	Cpeb3
chr19	37432600	37438000	Hhex
chr19	37686000	37688200	Cyp26c1
chr19	37695400	37699600	Cyp26a1
chr19	38124000	38125600	Rbp4
chr19	38264400	38265200	Lgi1
chr19	38836800	38838200	Tbc1d12
chr19	3935400	3936800	Unc93b1
chr19	40658600	40659400	Entpd1
chr19	4099800	4101800	Pitpnm1
chr19	41206000	41207400	Tll2
chr19	41384600	41385600	Pik3ap1
chr19	41742600	41743800	Slit1
chr19	42045800	42046600	Hoga1
chr19	4213200	4216400	Clcf1
chr19	4213200	4216400	Gm45928
chr19	42201000	42202800	Sfrp5
chr19	42612200	42614000	Loxl4
chr19	4268000	4269600	Ssh3
chr19	43439400	43442400	Cnnm1
chr19	43609400	43617600	Nkx2-3
chr19	43985800	43986800	Cpn1
chr19	44545200	44545800	Sec31b
chr19	44755000	44757800	Pax2
chr19	4476400	4478200	Syt12
chr19	44835000	44838800	1700039E22Rik
chr19	45044600	45049600	Pdzd7
chr19	45044600	45049600	Sfxn3
chr19	45150000	45151800	Tlx1
chr19	45232600	45237400	Lbx1
chr19	45741400	45743600	Fgf8
chr19	46131800	46132400	Elovl3
chr19	46147000	46149400	Pitx3
chr19	46348200	46349800	2310034G01Rik
chr19	4697800	4699200	Gm960
chr19	47012800	47016400	Ina
chr19	47012800	47016400	Nt5c2
chr19	4711000	4713200	Sptbn2
chr19	47854400	47856200	Gsto1
chr19	48204200	48206800	Sorcs3
chr19	4989600	4991400	Npas4
chr19	5051000	5053200	Rin1
chr19	5066800	5069000	Cd248
chr19	50677600	50679200	Sorcs1
chr19	5084600	5086200	Tmem151a
chr19	53528000	53530600	Dusp5
chr19	53675200	53677800	Rbm20
chr19	54044600	54048600	Adra2a
chr19	5447000	5449200	Fosl1
chr19	5473600	5475600	Efemp2
chr19	5559000	5561800	Ovol1
chr19	56396400	56398200	Casp7
chr19	56721200	56724800	Adrb1
chr19	56826000	56826800	Tdrd1
chr19	56873800	56875800	Vwa2
chr19	57007600	57009600	Afap1l2
chr19	5724800	5727000	Ehbp1l1
chr19	57314000	57315400	Ablim1
chr19	58453200	58456800	Gfra1
chr19	58859600	58861600	Hspa12a
chr19	59074800	59076400	Shtn1
chr19	59169000	59172400	Vax1
chr19	59260400	59261800	Slc18a2
chr19	59457400	59460600	Emx2
chr19	59457400	59460600	Emx2os
chr19	60466800	60468000	Prlhr
chr19	6184400	6185000	Majin
chr19	6829200	6831400	Mir5046
chr19	6838800	6841400	Rps6ka4
chr19	6924600	6927000	Catsperz
chr19	6932400	6934600	Kcnk4
chr19	7420400	7424800	Mir6991
chr19	7557000	7558800	Pla2g16
chr19	7606400	7608000	Lgals12
chr19	7611800	7613000	Hrasls5
chr19	8660800	8663200	9830166K06Rik
chr2	102400000	102401600	Trim44
chr2	102549600	102550400	Pamr1
chr2	102658200	102660000	Slc1a2
chr2	102900800	102901800	Cd44
chr2	103969000	103971400	Lmo2
chr2	104409400	104411000	D430041D05Rik
chr2	104711000	104712800	Tcp11l1
chr2	105125000	105128600	Wt1
chr2	105125000	105128600	Wt1os
chr2	105223800	105225000	Them7
chr2	105659200	105661200	Paupar
chr2	105666400	105670000	Pax6
chr2	105666400	105670000	Pax6os1
chr2	105672000	105680400	Pax6
chr2	105680800	105683600	Pax6
chr2	107290200	107291800	Kcna4
chr2	109692200	109695400	Bdnf
chr2	110362400	110363400	Fibin
chr2	11171800	11173000	Prkcq
chr2	113216200	113217800	Ryr3
chr2	113757000	113759400	Grem1
chr2	114012800	114014400	A530058N18Rik
chr2	114012800	114014400	Gjd2
chr2	11552200	11554400	Pfkfb3
chr2	116060400	116068200	G630016G05Rik
chr2	116060400	116068200	Meis2
chr2	116074800	116076400	2810405F15Rik
chr2	11705000	11707000	Il15ra
chr2	117341800	117343800	Rasgrp1
chr2	118110400	118112600	Gm13986
chr2	118110400	118112600	Thbs1
chr2	118372600	118374600	Gpr176
chr2	118675200	118678400	Pak6
chr2	118702200	118704800	Ankrd63
chr2	118728000	118729200	Plcb2
chr2	118744800	118747200	Inafm2
chr2	118761600	118764600	Ccdc9b
chr2	118779000	118780400	Disp2
chr2	118899000	118903600	Bahd1
chr2	118926000	118927600	Chst14
chr2	119166800	119168600	Gchfr
chr2	119269800	119271200	Rhov
chr2	119321600	119327800	Dll4
chr2	119321600	119327800	Gm14207
chr2	119757200	119761000	Ltk
chr2	120976400	120977400	Tmem62
chr2	122297200	122299400	Duox2
chr2	122297200	122299400	Duoxa2
chr2	122313000	122314800	Duoxa1
chr2	122467000	122468200	Bambi-ps1
chr2	122610800	122611800	Gatm
chr2	122637800	122638400	AA467197
chr2	122701600	122703400	Slc30a4
chr2	122764800	122766000	Sqor
chr2	12300800	12301800	E030013I19Rik
chr2	12300800	12301800	Itga8
chr2	124089800	124091400	Sema6d
chr2	124609400	124611400	Sema6d
chr2	125504800	125507200	Fbn1
chr2	125672400	125674200	Eid1
chr2	125722800	125725600	Shc4
chr2	127335800	127337200	Dusp2
chr2	127362200	127364600	Adra2b
chr2	127540600	127542000	Prom2
chr2	127654800	127657000	Mal
chr2	127728800	127730800	Mall
chr2	128863400	128864600	Fbln7
chr2	129592000	129594800	Sirpa
chr2	129698800	129700200	Pdyn
chr2	13009200	13012000	C1ql3
chr2	130294200	130296600	Ebf4
chr2	130396600	130398600	Cpxm1
chr2	130449000	130451400	Ptpra
chr2	130575800	130578200	Oxt
chr2	131040600	131042000	Mir6973b
chr2	131063000	131064000	Adam33
chr2	131126400	131127800	Hspa12b
chr2	131560800	131563400	Adra1d
chr2	132384200	132385600	Prokr2
chr2	132781000	132782400	Chgb
chr2	132944600	132946600	Fermt1
chr2	133551800	133553600	Bmp2
chr2	134785600	134787400	Plcb1
chr2	136057800	136060000	Lamp5
chr2	136711600	136714400	Snap25
chr2	13792800	13794400	St8sia6
chr2	139676400	139679400	Ism1
chr2	143862400	143863400	Bfsp1
chr2	145167200	145168800	Slc24a3
chr2	14603600	14605600	Cacnb2
chr2	146220400	146224200	Insm1
chr2	147083400	147085800	Nkx2-4
chr2	147182600	147185000	Nkx2-2os
chr2	147185400	147192000	6430503K07Rik
chr2	147185400	147192000	Nkx2-2
chr2	147361400	147362800	AI646519
chr2	147364800	147366400	Pax1
chr2	148043600	148047200	Foxa2
chr2	148394800	148396400	Sstr4
chr2	148405800	148408800	Thbd
chr2	149829400	149833000	Syndig1
chr2	150687600	150689400	Vsx1
chr2	151631600	151633000	Snph
chr2	151701600	151703200	Tmem74b
chr2	151842000	151843400	Rspo4
chr2	151972400	151974600	Fam110a
chr2	151996400	151997000	Slc52a3
chr2	152080600	152082600	Scrt2
chr2	152626600	152628000	Rem1
chr2	152753600	152755000	Cox4i2
chr2	152951000	152952800	Dusp15
chr2	153031000	153032800	Xkr7
chr2	153525200	153531200	Nol4l
chr2	154548800	154550200	1700003F12Rik
chr2	154551400	154553600	Actl10
chr2	155514400	155515200	Ggt7
chr2	155750600	155751800	Procr
chr2	155774600	155776400	Mmp24
chr2	155834200	155834800	Fam83c
chr2	155943200	155945000	Gdf5
chr2	156064800	156066800	Spag4
chr2	156474600	156476400	Epb41l1
chr2	156774200	156776000	Myl9
chr2	157077600	157080200	Soga1
chr2	157914200	157915200	Vstm2l
chr2	158145800	158146400	Tgm2
chr2	158609400	158611800	Gm14204
chr2	158609400	158611800	Slc32a1
chr2	160365000	160370600	Mafb
chr2	160911400	160912800	Emilin3
chr2	162658600	162662000	9430021M05Rik
chr2	162658600	162662000	Ptprt
chr2	163202600	163205200	Tox2
chr2	163437600	163439000	Gdap1l1
chr2	163853400	163854400	Kcnk15
chr2	163918000	163919600	Rims4
chr2	164170800	164171600	Kcns1
chr2	164402800	164403400	Rbpjl
chr2	164404200	164405200	Matn4
chr2	164485800	164487600	Dbndd2
chr2	164785200	164787400	Snx21
chr2	164967800	164969800	Slc12a5
chr2	165233200	165235400	Cdh22
chr2	165472800	165473400	Slc13a3
chr2	165503800	165504400	Slc2a10
chr2	165594800	165596600	Eya2
chr2	167188000	167191200	Kcnb1
chr2	167240000	167241200	Ptgis
chr2	167687600	167691400	A530013C23Rik
chr2	167687600	167691400	Cebpb
chr2	168268400	168269200	Kcng1
chr2	168600800	168602600	Nfatc2
chr2	169633000	169634400	Tshz2
chr2	170494800	170497800	Cyp24a1
chr2	170494800	170497800	Pfdn4
chr2	170730800	170732800	Dok5
chr2	172042000	172044200	Cbln4
chr2	172936400	172941200	Bmp7
chr2	173577800	173579000	Ankrd60
chr2	174298000	174301000	Gnas
chr2	174643800	174645200	Zfp831
chr2	174760200	174761600	Edn3
chr2	17729200	17732200	Nebl
chr2	178118200	178120200	Phactr3
chr2	178142200	178143000	Phactr3
chr2	178413200	178415000	Fam217b
chr2	178413200	178415000	Ppp1r3d
chr2	179442000	179444000	Cdh4
chr2	180102600	180106400	Hrh3
chr2	180333600	180335200	Gata5
chr2	180385400	180387000	B230312C02Rik
chr2	180385400	180387000	Mir1a-1hg
chr2	18045600	18050600	Skida1
chr2	180499000	180500600	Ntsr1
chr2	180597200	180599600	Col9a3
chr2	180640800	180642600	Tcfl5
chr2	180773800	180777400	Bhlhe23
chr2	180888400	180895600	Mir124a-3
chr2	181038400	181040000	Chrna4
chr2	181133800	181135600	Kcnq2
chr2	181156000	181157400	Eef1a2
chr2	181212000	181214200	Srms
chr2	181457600	181461000	Zbtb46
chr2	181670000	181672200	Sox18
chr2	18671600	18674600	Commd3
chr2	18675600	18678800	Bmi1
chr2	18698400	18699600	Spag6
chr2	18799600	18801800	Carlr
chr2	19444600	19446600	Ptf1a
chr2	19444600	19446600	Ptf1aos
chr2	21367200	21369200	Gpr158
chr2	22619400	22624600	Gad2
chr2	22773600	22774800	Apbb1ip
chr2	23320600	23322000	Nxph2
chr2	24367000	24368000	Psd4
chr2	24473400	24475600	Pax8
chr2	24761800	24763800	Cacna1b
chr2	25054400	25055000	Nsmf
chr2	25180200	25183000	Nrarp
chr2	25289400	25293000	Grin1os
chr2	25289400	25293000	Lrrc26
chr2	25318400	25319600	Grin1
chr2	25395400	25397000	Entpd2
chr2	25706200	25707800	Bmyc
chr2	25863000	25864600	Kcnt1
chr2	25877200	25878600	Kcnt1
chr2	26090600	26093000	Nacc2
chr2	26121800	26124000	Nacc2
chr2	26206000	26207000	Lhx3
chr2	26207600	26208200	Lhx3
chr2	26315200	26316600	Gpsm1
chr2	26627800	26629600	Fam69b
chr2	27027200	27028800	Slc2a6
chr2	27141600	27142600	Fam163b
chr2	27427200	27428000	Vav2
chr2	27675600	27678800	Rxra
chr2	28192200	28194000	Olfm1
chr2	28204800	28207000	Olfm1
chr2	28446000	28447800	Ppp1r26
chr2	28911200	28912400	Barhl1
chr2	28915400	28916800	Barhl1
chr2	29249800	29253800	6530402F18Rik
chr2	29844200	29846800	Mir219a-2
chr2	29844200	29846800	Mir219b
chr2	30676600	30678000	Gm14486
chr2	30800600	30802400	1700001O22Rik
chr2	30844800	30846400	Prrx2
chr2	30901800	30903600	Ptges
chr2	31245000	31247400	Ncs1
chr2	31635000	31641200	Prdm12
chr2	31845000	31847400	Fibcd1
chr2	31887000	31887800	Lamc3
chr2	31950000	31951200	Aif1l
chr2	32082400	32085000	Fam78a
chr2	32317800	32319200	Gm23363
chr2	32317800	32319200	Mir199b
chr2	32380600	32381600	1110008P14Rik
chr2	32382000	32382600	1110008P14Rik
chr2	32740800	32742400	6330409D20Rik
chr2	33638000	33643600	C130021I20Rik
chr2	33638000	33643600	Lmx1b
chr2	33886200	33888200	Mvb12b
chr2	34107400	34108200	C230014O12Rik
chr2	34912800	34915200	Phf19
chr2	35255800	35257400	Gsn
chr2	35281800	35283000	Gsn
chr2	35558000	35559400	Dab2ip
chr2	35558000	35559400	Gm13446
chr2	35580000	35583400	Dab2ip
chr2	35621400	35623800	Dab2ip
chr2	35978400	35980400	Ttll11
chr2	36102000	36105800	Lhx6
chr2	36230200	36231400	Ptgs1
chr2	37775400	37776800	Crb2
chr2	38339200	38340800	Lhx2
chr2	38350200	38352800	Lhx2
chr2	38711400	38712600	Nr5a1
chr2	42652200	42653400	Lrp1b
chr2	4400600	4402600	Frmd4a
chr2	45108600	45111400	Zeb2
chr2	45108600	45111400	Zeb2os
chr2	4716600	4719200	Bend7
chr2	49619400	49620800	Kif5c
chr2	49787000	49788400	Lypd6b
chr2	5137200	5138800	Ccdc3
chr2	51934000	51935600	Rbm43
chr2	52674600	52677000	Cacnb4
chr2	55435600	55438400	Kcnj3
chr2	57113600	57117600	Nr4a2
chr2	58356600	58358400	Acvr1c
chr2	60283000	60284600	Cd302
chr2	6129200	6130200	Proser2
chr2	6133000	6134400	Gm10857
chr2	61804600	61806200	Tbr1
chr2	65021800	65023400	Grb14
chr2	65237400	65239800	Cobll1
chr2	65363800	65364400	Mir6337
chr2	65363800	65364400	Slc38a11
chr2	66123600	66125600	Galnt3
chr2	6871200	6873400	Celf2
[truncated: 1,586 more rows]
